# Supplementary material
Source: publisher figshare collection journal article supplement (https://acs.figshare.com/ndownloader/files/15596111)
Supplement: Supplementary file 1 [file 15596111]

## Supporting Information

# Immunomodulatory Effects of Dendritic Poly(ethyleneimine) Glycoarchitectures on Human Multiple Myeloma Cell Lines, Mesenchymal Stromal Cells, and in Vitro Differentiated Macrophages for an Ideal Drug Delivery System in the Local Treatment of Multiple Myeloma

*Felix Schulze<sup>1</sup>, Bettina Keperscha<sup>2</sup>, Dietmar Appelhans<sup>2\*</sup> & Angela Rösen-Wolff<sup>d\*</sup>*

<sup>1</sup>Department of Pediatrics, University Hospital Carl Gustav Carus, TU Dresden, Fetscherstraße  
74, 01307 Dresden, Germany

<sup>2</sup>Leibniz Institute of Polymer Research Dresden, Hohe Str. 6, 01069 Dresden, Germany

### **Corresponding Author**

\*E-mail: [applhans@ipfdd.de](mailto:applhans@ipfdd.de); [angela.roesen-wolff@uniklinikum-dresden.de](mailto:angela.roesen-wolff@uniklinikum-dresden.de)

**Table S1.** Structural parameters of dendritic glycoarchitectures

| glycoarchitecture   | $M_n$ [g/mol] <sup>a</sup> | Maltose units <sup>a</sup> | $D_h$ [nm] <sup>b</sup> |
|---------------------|----------------------------|----------------------------|-------------------------|
| <b>PEI-5-Mal B</b>  | 14084                      | 32                         | 6,6                     |
| <b>PEI-25-Mal B</b> | 35508                      | 79                         | 8,6                     |
| <b>PEI-PGlu-Mal</b> | 63137                      | 56                         | 5,8                     |

<sup>a</sup> Determined by elemental analysis. Following the approach described in *Biomacromolecules* **2009**, *10* (5), 1114.

<sup>b</sup> Dynamic light scattering determined by volume plot.

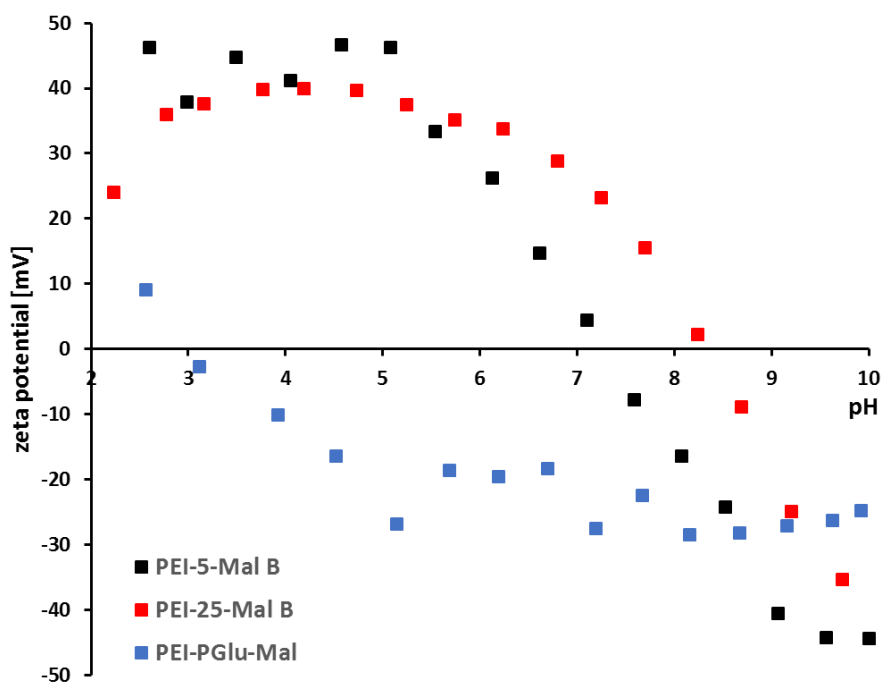

**Figure S1.** pH-dependent zeta potential measurements of dendritic glycoarchitectures.

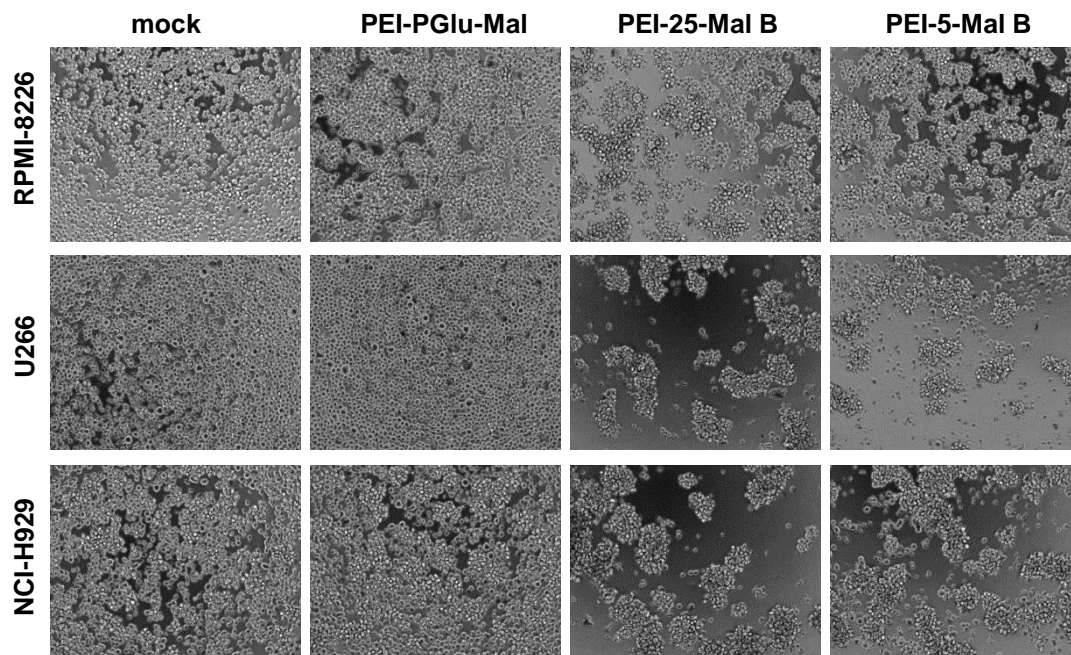

**Figure S2.** Visualization of multiple myeloma viability after PEI-DGAs incubation.

Multiple myeloma cell lines (RPMI-8226, U266, NCI-H929) were incubated with 1 mg/mL PEI-DGAs for 24h. Macroscopic visualization of cell viability was admitted with 10x magnification.

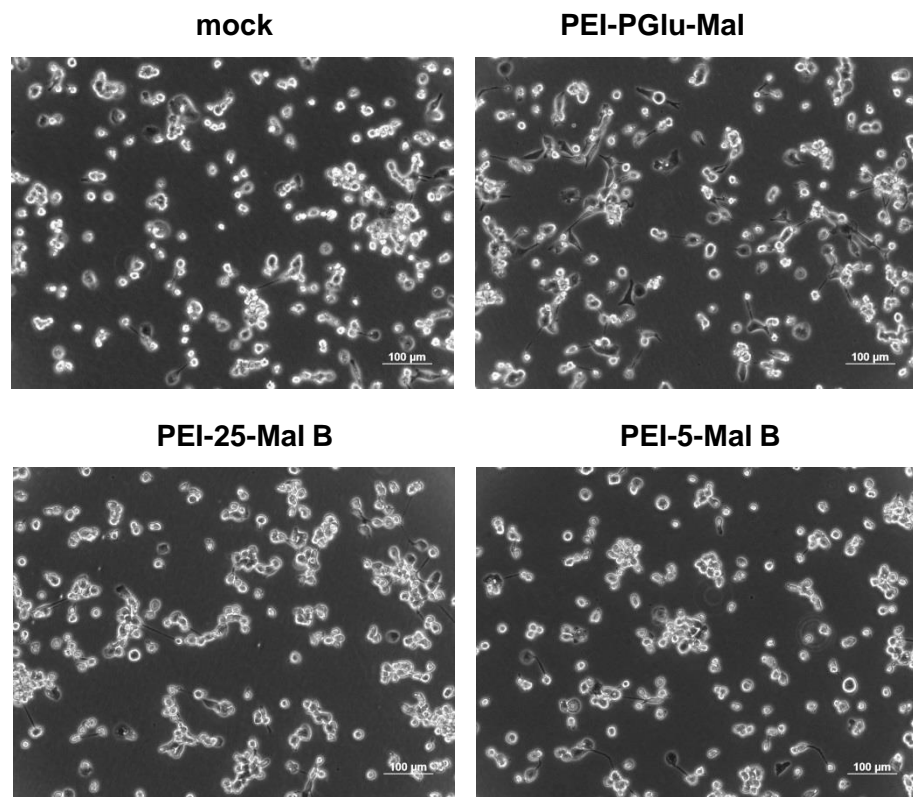

**Figure S3.** Visualization of macrophage viability after PEI-DGAs incubation.

Differentiated THP-1 cells were incubated with 1 mg/mL PEI-DGAs for 24h. Macroscopic visualization of cell viability was admitted with 10x magnification.

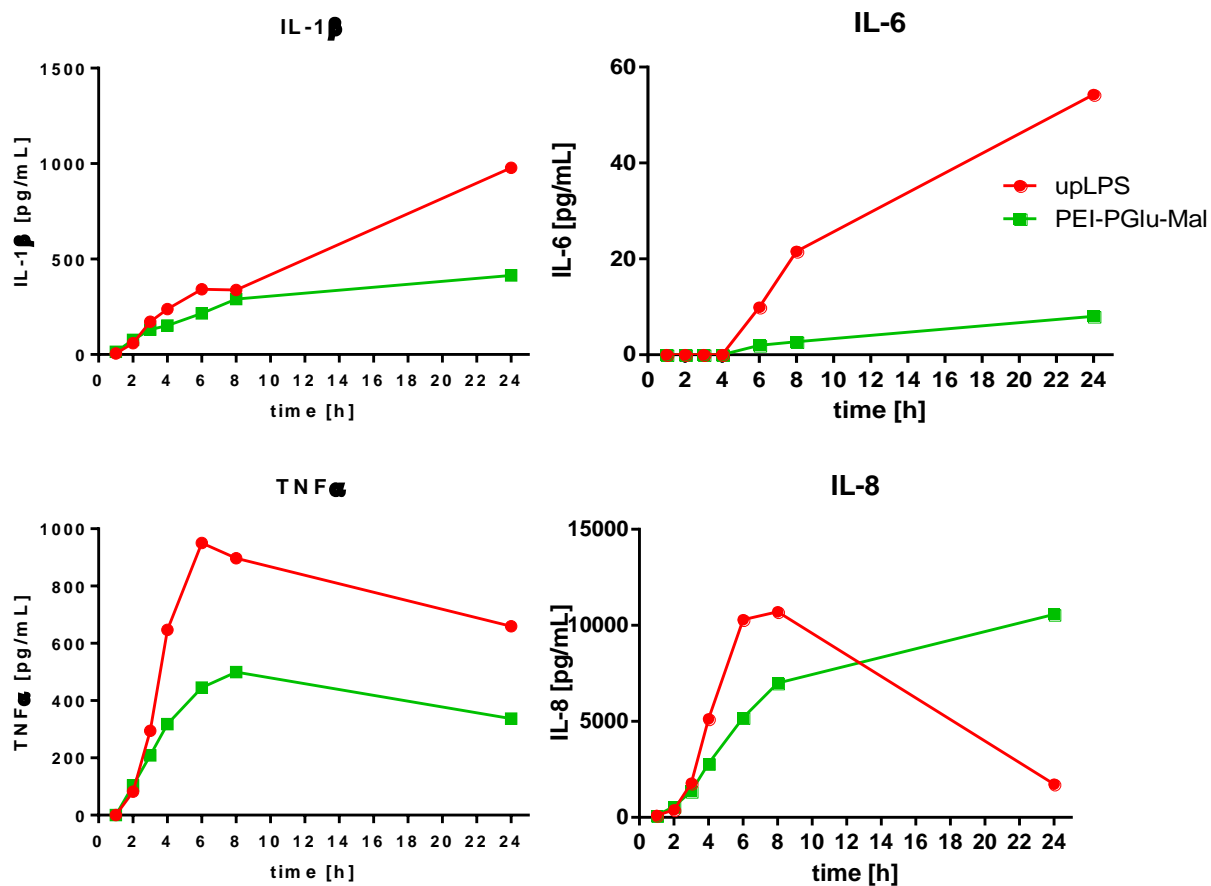

**Figure S4.** Time dependent cytokine release after PEI-DGA incubation.

Differentiated THP-1 cells were stimulated 50 ng/mL upLPS or with 1 mg/mL PEI-PGlu-Mal for indicated time points. Cytokine concentration was measured by CBA.

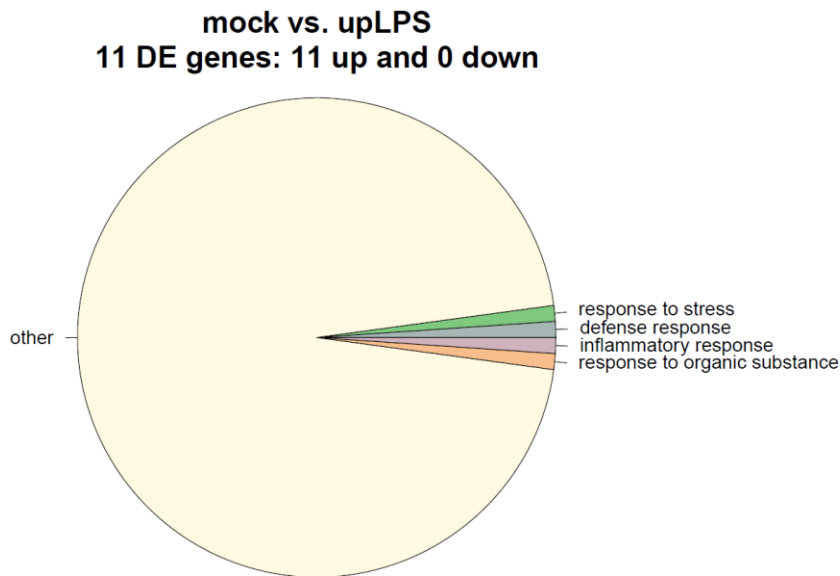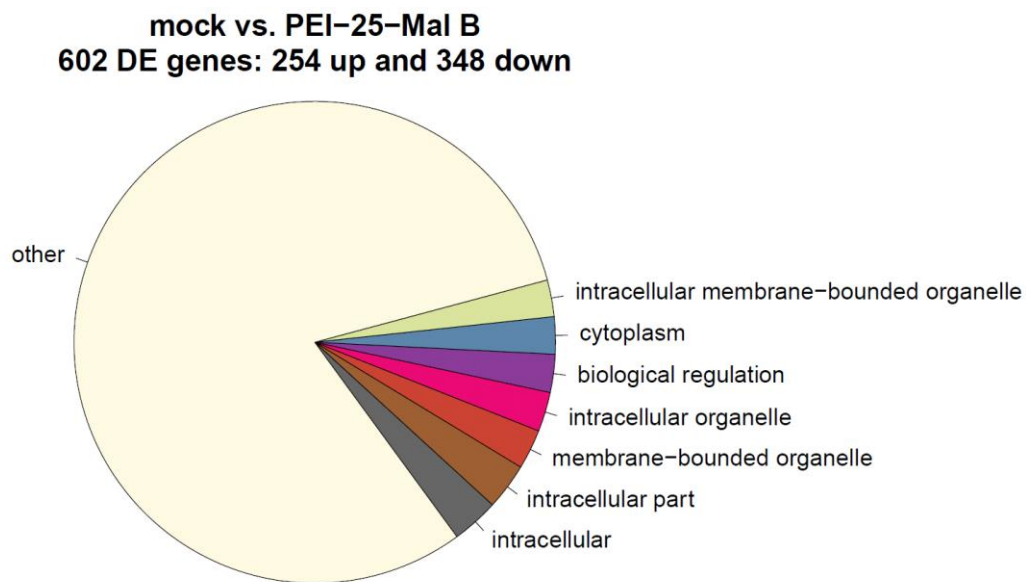

**Figure S5.** GO annotation of significantly regulated genes by upLPS and PEI-25-Mal B

Human MSCs were stimulated for 24h with 1mg/mL PEI-PGlu346-Mal, PEI-25-Mal B and PEI-5-Mal B or 50ng/mL upLPS. Afterwards transcriptome was analyzed through RNA sequencing. The goana function of edgeR was used to perform an over representation analysis for gene ontology (GO) terms of the differentially expressed genes. GO terms with a p-value  $\leq 0.01$  were selected. In the pie charts GO terms which match to at least 50% of the differentially expressed genes are shown.
